# Supplementary material for: A novel molecular logic system based on lead-induced substitution of potassium from a G-quadruplex as a fluorescent lead sensor
Source: Royal Society of Chemistry journal article supplement (doi:10.1039/c3ay41097h), 2013-01-01
Supplement: c3ay41097h.pdf [file c3ay41097h.pdf]

## **Electronic Supplementary Information (ESI)**

### **A novel molecular logic system based on lead-induced substitution of potassium from G-quadruplex as a fluorescent lead sensor**

**Xiangyu Wang, Qiang Xi, Lei Peng, Jia Ge, Yingya Kan, Jianhui Jiang\*, Guoli Shen, Ruqin Yu\***

State Key Laboratory of Chemo/Biosensing and Chemometrics, College of Chemistry and Chemical Engineering, Hunan University, Changsha, 410082, P. R. China

To whom correspondence should be addressed.

Tel: +86 731 88822577.

Fax: +86 731 88822577.

E-mail address: [rquy@hnu.edu.cn](mailto:rquy@hnu.edu.cn) (Ruqin Yu)

[jianhuijiang@hnu.edu.cn](mailto:jianhuijiang@hnu.edu.cn) (Jianhui Jiang)

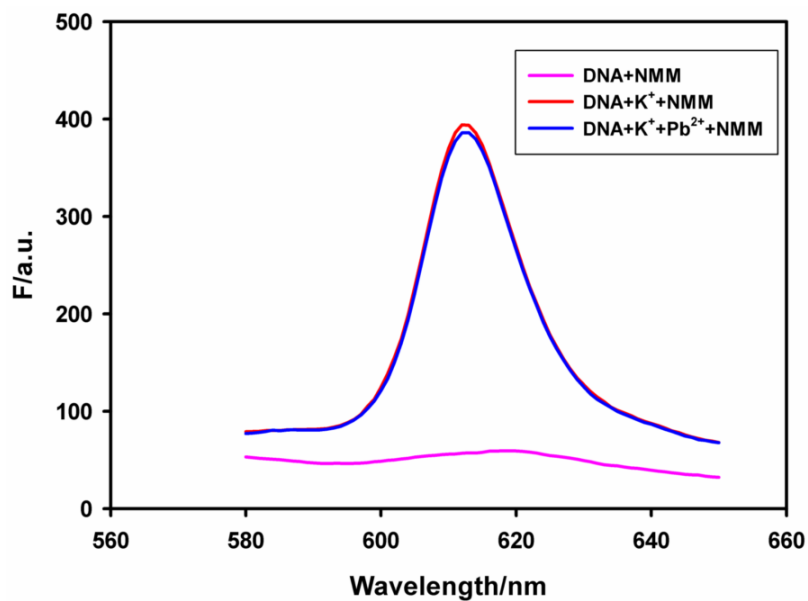

**Fig. S1** Fluorescence emission spectra of DNA (400 nm) at different conditions: 400 nM NMM (curve in pink), 2 mM K<sup>+</sup> and 400 nM NMM (curve in red), 2 mM K<sup>+</sup>, 400 nM Pb<sup>2+</sup> and 400 nM NMM (curve in blue), respectively. The DNA sequence is 5-AAGGGTGGGTGGGTGGGTACCCTT-3. All measurements are performed in Tris-HCl (10 mM, pH 7.4).

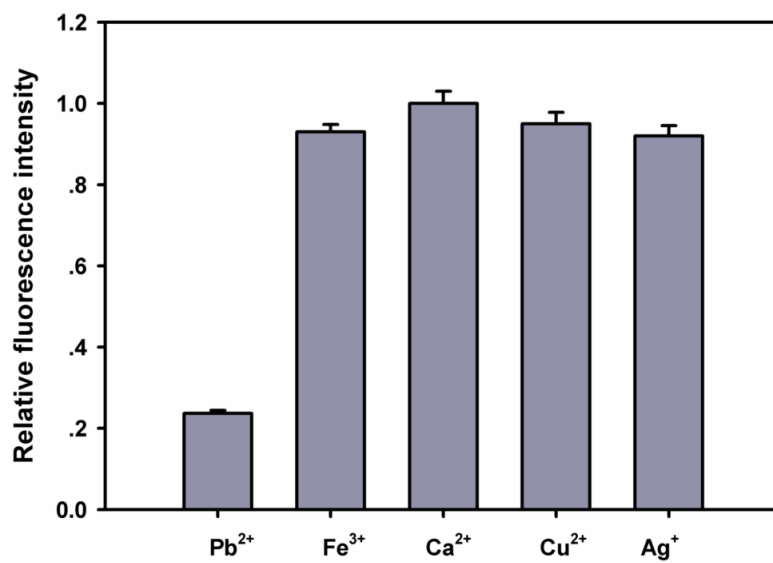

**Fig. S2** Selectivity of label-free logic gate for detection of Pb<sup>2+</sup> in the presence of K<sup>+</sup> (2 mM). The concentration of Pb<sup>2+</sup> and other metal ions are 400 nM and 5 μM, respectively. All the experiments are performed under the optimal experimental conditions.

**Table S1** Analysis of  $\text{Pb}^{2+}$  in tap water samples by the proposed biosensor.

| Sample      | $\text{Pb}^{2+}$ added (nM) | $\text{Pb}^{2+}$ found (nM) | Recovery (%) |
|-------------|-----------------------------|-----------------------------|--------------|
| Tap water 1 | 15                          | 14.2                        | 94.6         |
| Tap water 2 | 40                          | 37.4                        | 93.5         |
| Tap water 3 | 70                          | 66.4                        | 94.8         |
| Tap water 4 | 120                         | 117.1                       | 97.6         |
| Tap water 5 | 150                         | 148.5                       | 99.0         |

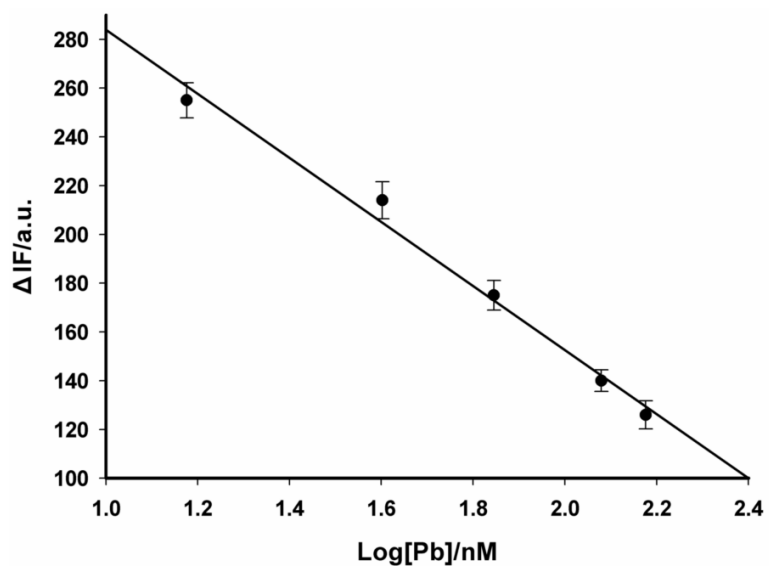

**Fig. S3** Calibration curve of  $\text{Pb}^{2+}$  assay in tap water. All the experiments are performed under the optimal experimental conditions. The background fluorescence of free NMM is subtracted from the sample solution.
